# Supplementary material for: Premature mortality attributable to COVID-19: potential years of life lost in 17 countries around the world, January–August 2020
Source: Springer Nature journal article supplement (doi:10.1186/s12889-021-12377-1), 2022-01-09
Supplement: MOESM1 [file 12889_2021_12377_MOESM1_ESM.pdf]

## SUPPLEMENTARY FILE

Supplementary Table 1. Summary of life expectancy, time unit, COVID-19 deaths definition, and national data source per country.

| Country           | Life Expectancy*** | Time unit     | Type of COVID-19 Deaths reported |                                          | Source                                                                                                                       |
|-------------------|--------------------|---------------|----------------------------------|------------------------------------------|------------------------------------------------------------------------------------------------------------------------------|
|                   |                    |               | Cause of death                   | Cause of death or contributing condition |                                                                                                                              |
| Australia         | 83                 | National week | x                                |                                          | Australian Bureau of Statistics                                                                                              |
| Brazil            | 76                 | ISO           |                                  | x                                        | The surveillance system of severe acute respiratory syndromes, Ministry of Health                                            |
| Cape Verde        | 73                 | Month         |                                  | x                                        | Ministry of Health; Integrated surveillance system and emergency response; National Public Health Institute                  |
| Colombia          | 77                 | Month         |                                  | x                                        | Instituto Nacional de Salud                                                                                                  |
| Cyprus            | 83                 | ISO           | x                                |                                          | Epidemiological Surveillance Unit, Ministry of Health                                                                        |
| England and Wales | 81                 | National week | x                                |                                          | Office for National Statistics                                                                                               |
| France*           | 83                 | ISO           | x                                |                                          | National Institute of Demographic Studies/Public Health France                                                               |
| Georgia           | 74                 | ISO           | x                                |                                          | Vital Registration System of the National Center for Disease Control and Public Health National Statistics Office of Georgia |
| Israel            | 83                 | Epi           |                                  | x                                        | Ministry of Health                                                                                                           |
| Kazakhstan**      | 73                 | ISO           | x                                |                                          | Ministry of Health                                                                                                           |
| Norway            | 83                 | ISO           |                                  | x                                        | Norwegian Surveillance System for Communicable Diseases                                                                      |
| Peru              | 77                 | ISO           |                                  | x                                        | Ministry of Health                                                                                                           |
| Scotland          | 79                 | ISO           | x                                |                                          | National Records of Scotland                                                                                                 |

|                      |    |       |   |   |                                       |
|----------------------|----|-------|---|---|---------------------------------------|
| <b>Slovenia</b>      | 81 | ISO   |   | x | National Institute of Public Health   |
| <b>Sweden</b>        | 83 | Month | x |   | National Board of Health and Welfare  |
| <b>Ukraine</b>       | 72 | ISO   | x |   | Cabinet of Ministers of Ukraine       |
| <b>United States</b> | 79 | Epi   |   | x | National Center for Health Statistics |

---

Abbreviations: ISO: International Organization for Standardization; Epi: epidemiological

\*COVID-19 deaths in France only accounted for those who died in the hospital due to COVID-19.

\*\* Data of deaths register due COVID-19 by sex and age-group in Kazakhstan, are counting just up to week 31 of 2020 (31 included).

\*\*\* Data obtained from the World bank (<https://data.worldbank.org/>), except for the UK nations, for which data was obtained from the Office for National Statistics (<https://www.ons.gov.uk/>), and for Cyprus from Eurostat (<https://ec.europa.eu/eurostat/en/>) to include only the population in the Republic of Cyprus government controlled-area. Life expectancy data was based on 2018 estimates and represents the average of males' and females' life expectancy.

**Supplementary Table 2. Country Specific Death and number of Potential Years of Life Lost (PYLL) per age-group and sex**

| <b>Australia</b> |          |              |             |                |              |             |              |             |
|------------------|----------|--------------|-------------|----------------|--------------|-------------|--------------|-------------|
| Age group        | Midpoint | Deaths Males | PYLL Males  | Deaths Females | PYLL Females | Sex unknown | Total deaths | Total PYLL  |
| 0-29             | 14.5     | 1            | 65          | 0              | 0            | 0           | 1            | 65          |
| 30-39            | 34.5     | 2            | 90          | 0              | 0            | 0           | 2            | 90          |
| 40-49            | 44.5     | 2            | 70          | 0              | 0            | 0           | 2            | 70          |
| 50-59            | 54.5     | 9            | 225         | 4              | 100          | 0           | 13           | 325         |
| 60-69            | 64.5     | 16           | 240         | 8              | 120          | 0           | 24           | 360         |
| 70-79            | 74.5     | 69           | 345         | 36             | 180          | 0           | 105          | 525         |
| 80-89            | -        | 105          | 0           | 116            | 0            | 0           | 221          | 0           |
| 90-99            | -        | 64           | 0           | 87             | 0            | 0           | 151          | 0           |
| 100+             | -        | 1            |             | 5              |              | 0           | 6            | 0           |
| <b>Total</b>     |          | <b>269</b>   | <b>1035</b> | <b>256</b>     | <b>400</b>   | <b>0</b>    | <b>525</b>   | <b>1435</b> |
| <b>Brazil</b>    |          |              |             |                |              |             |              |             |
| Age group        | Midpoint | Deaths Males | PYLL Males  | Deaths Females | PYLL Females | Sex unknown | Total deaths | Total PYLL  |
| 0-9              | 4.5      | 216          | 16200       | 190            | 14250        | 0           | 406          | 30450       |
| 10-19            | 14.5     | 160          | 10400       | 163            | 10595        | 0           | 323          | 20995       |
| 20-29            | 24.5     | 697          | 38335       | 571            | 31405        | 0           | 1268         | 69740       |
| 30-39            | 34.5     | 2316         | 104220      | 1562           | 70290        | 0           | 3878         | 174510      |
| 40-49            | 44.5     | 5400         | 189000      | 3046           | 106610       | 0           | 8446         | 295610      |
| 50-59            | 54.5     | 9985         | 249625      | 5878           | 146950       | 0           | 15863        | 396575      |
| 60-69            | 64.5     | 16804        | 252060      | 10627          | 159405       | 0           | 27431        | 411465      |
| 70-79            | 74.5     | 18307        | 91535       | 12669          | 63345        | 0           | 30976        | 154880      |

|                   |                 |                     |                   |                       |                     |                    |                     |                   |
|-------------------|-----------------|---------------------|-------------------|-----------------------|---------------------|--------------------|---------------------|-------------------|
| 80-89             | -               | 12892               | 0                 | 11565                 | 0                   | 0                  | 24457               | 0                 |
| 90-99             | -               | 3318                | 0                 | 4235                  | 0                   | 0                  | 7553                | 0                 |
| 100-110           | -               | 168                 | 0                 | 242                   | 0                   | 0                  | 410                 | 0                 |
| 110+              | -               | 6                   | 0                 | 8                     | 0                   | 0                  | 14                  | 0                 |
| Unknown           | -               | 212                 | 0                 | 176                   | 0                   | 18                 | 406                 | 0                 |
| <b>Total</b>      |                 | <b>70481</b>        | <b>951375</b>     | <b>50932</b>          | <b>602850</b>       | <b>18</b>          | <b>121431</b>       | <b>1554225</b>    |
| <b>Cape-Verde</b> |                 |                     |                   |                       |                     |                    |                     |                   |
| <b>Age group</b>  | <b>Midpoint</b> | <b>Males</b>        | <b>PYLL Males</b> | <b>Females</b>        | <b>PYLL Females</b> | <b>Sex unknown</b> | <b>Total deaths</b> | <b>Total PYLL</b> |
| 0-4               | 2               | 0                   | 0                 | 0                     | 0                   | 0                  | 0                   | 0                 |
| 5-9               | 7               | 0                   | 0                 | 0                     | 0                   | 0                  | 0                   | 0                 |
| 10-14             | 12              | 0                   | 0                 | 0                     | 0                   | 0                  | 0                   | 0                 |
| 15-44             | 29.5            | 1.8                 | 90                | 0.91                  | 45.5                | 0                  | 2.71                | 135.5             |
| 45-49             | 47              | 0.2                 | 6.6               | 0.09                  | 2.97                |                    | 0.29                | 9.57              |
| 50-64             | 57              | 8                   | 184               | 5                     | 115                 | 0                  | 13                  | 299               |
| 65-79             | 72              | 12                  | 96                | 6                     | 48                  | 0                  | 18                  | 144               |
| 80+               | -               | 4                   | 0                 | 2                     | 0                   | 0                  | 6                   | 0                 |
| <b>Total</b>      |                 | <b>26</b>           | <b>376.6</b>      | <b>14</b>             | <b>211.47</b>       | <b>0</b>           | <b>40</b>           | <b>588.07</b>     |
| <b>Colombia</b>   |                 |                     |                   |                       |                     |                    |                     |                   |
| <b>Age group</b>  | <b>Midpoint</b> | <b>Deaths Males</b> | <b>PYLL Males</b> | <b>Deaths Females</b> | <b>PYLL Females</b> | <b>Sex unknown</b> | <b>Total deaths</b> | <b>Total PYLL</b> |
| 0-4               | 2               | 10                  | 780               | 11                    | 858                 | 0                  | 21                  | 1638              |
| 05.-14            | 9.5             | 12                  | 840               | 7                     | 490                 | 0                  | 19                  | 1330              |
| 15-44             | 29.5            | 944                 | 47200             | 459                   | 22950               | 0                  | 1403                | 70150             |
| 45-64             | 54.5            | 3838                | 95950             | 1772                  | 44300               | 0                  | 5610                | 140250            |
| 65-79             | 72              | 6331.77             | 50654.16          | 3738.54               | 28039.05            | 0                  | 10070.31            | 80562.48          |
| 80+               | -               | 1485.23             | 0                 | 1054.46               | 0                   | 0                  | 2539.69             | 0                 |

| Total                      |          | 12621        | 195424.16  | 7042           | 98506.32     | 0           | 19663        | 293930.48  |
|----------------------------|----------|--------------|------------|----------------|--------------|-------------|--------------|------------|
| <b>Cyprus</b>              |          |              |            |                |              |             |              |            |
| Age group                  | Midpoint | Deaths Males | PYLL Males | Deaths Females | PYLL Females | Sex unknown | Total deaths | Total PYLL |
| 0-39                       | 19.5     | 0            | 0          | 0              | 0            | 0           | 0            | 0          |
| 40-49                      | 44.5     | 1            | 35         | 0              | 0            | 0           | 1            | 35         |
| 50-59                      | 54.5     | 1            | 25         | 0              | 0            | 0           | 1            | 25         |
| 60-69                      | 64.5     | 7            | 105        | 0              | 0            | 0           | 7            | 105        |
| 70-79                      | 74.5     | 5            | 25         | 4              | 20           | 0           | 9            | 45         |
| 80+                        | -        | 0            | 0          | 2              | 0            | 0           | 2            | 0          |
| Total                      |          | 14           | 190        | 6              | 20           | 0           | 20           | 210        |
| <b>England &amp; Wales</b> |          |              |            |                |              |             |              |            |
| Age group                  | Midpoint | Males        | PYLL Males | Females        | PYLL Females | Sex unknown | Total deaths | Total PYLL |
| <1                         | 0.5      | 2            | 158        | 0              | 0            | 0           | 2            | 158        |
| 1-4                        | 2.5      | 0            | 0          | 1              | 77           | 0           | 1            | 77         |
| 5-9                        | 7        | 0            | 0          | 1              | 73           | 0           | 1            | 73         |
| 10-14                      | 12       | 2            | 136        | 1              | 68           | 0           | 3            | 204        |
| 15-19                      | 17       | 5            | 315        | 4              | 252          | 0           | 9            | 567        |
| 20-24                      | 22       | 15           | 870        | 10             | 580          | 0           | 25           | 1450       |
| 25-29                      | 27       | 32           | 1696       | 17             | 901          | 0           | 49           | 2597       |
| 30-34                      | 32       | 47           | 2256       | 35             | 1680         | 0           | 82           | 3936       |
| 35-39                      | 37       | 76           | 3268       | 57             | 2451         | 0           | 133          | 5719       |
| 40-44                      | 42       | 164          | 6232       | 94             | 3572         | 0           | 258          | 9804       |
| 45-49                      | 47       | 293          | 9669       | 184            | 6072         | 0           | 477          | 15741      |
| 50-54                      | 52       | 558          | 15624      | 316            | 8848         | 0           | 874          | 24472      |
| 55-59                      | 57       | 1009         | 23207      | 485            | 11155        | 0           | 1494         | 34362      |

|                   |          |              |            |                |              |             |              |            |
|-------------------|----------|--------------|------------|----------------|--------------|-------------|--------------|------------|
| 60-64             | 62       | 1400         | 25200      | 717            | 12906        | 0           | 2117         | 38106      |
| 65-69             | 67       | 1877         | 24401      | 1006           | 13078        | 0           | 2883         | 37479      |
| 70-74             | 72       | 3061         | 24488      | 1699           | 13592        | 0           | 4760         | 38080      |
| 75-79             | 77       | 4245         | 12735      | 2640           | 7920         | 0           | 6885         | 20655      |
| 80-84             | -        | 5679         | 0          | 4175           | 0            | 0           | 9854         | 0          |
| 85-89             | -        | 5461         | 0          | 5121           | 0            | 0           | 10582        | 0          |
| 90+               | -        | 4540         | 0          | 6711           | 0            | 0           | 11251        | 0          |
| Total             |          | 28466        | 150255     | 23274          | 83225        | 0           | 51740        | 233480     |
| <b>France</b>     |          |              |            |                |              |             |              |            |
| Age group         | Midpoint | Deaths Males | PYLL Males | Deaths Females | PYLL Females | Sex unknown | Total deaths | Total PYLL |
| 0-9               | 4.5      | 2            | 150        | 1              | 75           | 0           | 3            | 225        |
| 10-19             | 14.5     | 2            | 130        | 2              | 130          | 0           | 4            | 260        |
| 20-29             | 24.5     | 17           | 935        | 9              | 495          | 0           | 26           | 1430       |
| 30-39             | 34.5     | 59           | 2655       | 39             | 1755         | 0           | 98           | 4410       |
| 40-49             | 44.5     | 168          | 5880       | 90             | 3150         | 0           | 258          | 9030       |
| 50-59             | 54.5     | 639          | 15975      | 302            | 7550         | 0           | 941          | 23525      |
| 60-69             | 64.5     | 1703         | 25545      | 705            | 10575        | 0           | 2408         | 36120      |
| 70-79             | 74.5     | 3087         | 15435      | 1399           | 6995         | 0           | 4486         | 22430      |
| 80-89             | -        | 4224         | 0          | 3151           | 0            | 0           | 7375         | 0          |
| 90-120            | -        | 1813         | 0          | 2497           | 0            | 0           | 4310         | 0          |
| Unknown           | -        | 78           |            | 33             |              | 137         | 248          | 0          |
| Total             |          | 11792        | 66705      | 8228           | 30725        | 137         | 20157        | 97430      |
| <b>Kazakhstan</b> |          |              |            |                |              |             |              |            |
| Age group         | Midpoint | Deaths Males | PYLL Males | Deaths Females | PYLL Females | Sex unknown | Total deaths | Total PYLL |
| 0-9               | 4.5      | 0            | 0          | 0              | 0            | 0           | 0            | 0          |

| 10.-19         | 14.5     | 0            | 0          | 0              | 0            | 0           | 0            | 0          |
|----------------|----------|--------------|------------|----------------|--------------|-------------|--------------|------------|
| 20-29          | 24.5     | 1            | 55         | 7              | 385          | 0           | 8            | 440        |
| 30-39          | 34.5     | 9            | 405        | 10             | 450          | 0           | 19           | 855        |
| 40-49          | 44.5     | 49           | 1715       | 27             | 945          | 0           | 76           | 2660       |
| 50-59          | 54.5     | 125          | 3125       | 73             | 1825         | 0           | 198          | 4950       |
| 60-69          | 64.5     | 191          | 2865       | 141            | 2115         | 0           | 332          | 4980       |
| 70-79          | 74.5     | 147          | 735        | 115            | 575          | 0           | 262          | 1310       |
| 80-89          | -        | 57           | 0          | 65             | 0            | 0           | 122          | 0          |
| 90+            | -        | 3            | 0          | 10             | 0            | 0           | 13           | 0          |
| Unknown        | -        | 0            | 0          | 0              | 0            | 0           | 0            | 0          |
| Total          |          | 582          | 8900       | 448            | 6295         | 0           | 1030         | 15195      |
| <b>Georgia</b> |          |              |            |                |              |             |              |            |
| Age group      | Midpoint | Deaths Males | PYLL Males | Deaths Females | PYLL Females | Sex unknown | Total deaths | Total PYLL |
| 0-4            | 2        | 0            | 0          | 0              | 0            | 0           | 0            | 0          |
| 5-9            | 7        | 0            | 0          | 0              | 0            | 0           | 0            | 0          |
| 10.-14         | 12       | 0            | 0          | 0              | 0            | 0           | 0            | 0          |
| 15-19          | 17       | 0            | 0          | 0              | 0            | 0           | 0            | 0          |
| 20-24          | 22       | 0            | 0          | 0              | 0            | 0           | 0            | 0          |
| 25-29          | 27       | 0            | 0          | 0              | 0            | 0           | 0            | 0          |
| 30-34          | 32       | 0            | 0          | 0              | 0            | 0           | 0            | 0          |
| 35-39          | 37       | 0            | 0          | 0              | 0            | 0           | 0            | 0          |
| 40-44          | 42       | 0            | 0          | 0              | 0            | 0           | 0            | 0          |
| 45-49          | 47       | 0            | 0          | 1              | 33           | 0           | 1            | 33         |
| 50-54          | 52       | 0            | 0          | 0              | 0            | 0           | 0            | 0          |
| 55-59          | 57       | 0            | 0          | 1              | 23           | 0           | 1            | 23         |
| 60-64          | 62       | 0            | 0          | 0              | 0            | 0           | 0            | 0          |
| 65-69          | 67       | 2            | 26         | 0              | 0            | 0           | 2            | 26         |
| 70-74          | 72       | 1            | 8          | 2              | 16           | 0           | 3            | 24         |

| 75-79         | 77       | 1               | 3          | 1                 | 3               | 0              | 2               | 6          |
|---------------|----------|-----------------|------------|-------------------|-----------------|----------------|-----------------|------------|
| 80-84         | 82       | 4               | 0          | 3                 | 0               | 0              | 7               | 0          |
| 85-89         | -        | 0               | 0          | 2                 | 0               | 0              | 2               | 0          |
| 90+           | -        | 0               | 0          | 0                 | 0               | 0              | 0               | 0          |
| Total         |          | 8               | 37         | 10                | 75              | 0              | 18              | 112        |
| <b>Israel</b> |          |                 |            |                   |                 |                |                 |            |
| Age group     | Midpoint | Deaths<br>Males | PYLL Males | Deaths<br>Females | PYLL<br>Females | Sex<br>unknown | Total<br>deaths | Total PYLL |
| 0-4           | 2        | 0               | 0          | 0                 | 0               | 0              | 0               | 0          |
| 05.-14        | 9.5      | 0               | 0          | 0                 | 0               | 0              | 0               | 0          |
| 15-24         | 19.5     | 1               | 60         | 2                 | 120             | 0              | 3               | 180        |
| 25-34         | 29.5     | 2               | 100        | 2                 | 100             | 0              | 4               | 200        |
| 35-44         | 39.5     | 4               | 160        | 2                 | 80              | 0              | 6               | 240        |
| 45-54         | 49.5     | 11              | 330        | 12                | 360             | 0              | 23              | 690        |
| 55-64         | 59.5     | 38              | 760        | 19                | 380             | 0              | 57              | 1140       |
| 65-74         | 69.5     | 95              | 950        | 42                | 420             | 0              | 137             | 1370       |
| 75-79         | 77.5     | 40.5            | 81         | 31.93             | 63.86           | 0              | 265             | 144.86     |
| 80+           | -        | 293.5           |            | 315.07            |                 |                | 416             |            |
| Total         |          | 485             | 2441       | 426               | 1523.86         | 0              | 911             | 3964.86    |
| <b>Norway</b> |          |                 |            |                   |                 |                |                 |            |
| Age group     | Midpoint | Deaths<br>Males | PYLL Males | Deaths<br>Females | PYLL<br>Females | Sex<br>unknown | Total<br>deaths | Total PYLL |
| 0-9           | 4.5      | 0               | 0          | 0                 | 0               | 0              | 0               | 0          |
| 10.-19        | 14.5     | 0               | 0          | 0                 | 0               | 0              | 0               | 0          |
| 20-29         | 24.5     | 1               | 55         | 0                 | 0               | 0              | 1               | 55         |
| 30-39         | 34.5     | 0               | 0          | 0                 | 0               | 0              | 0               | 0          |
| 40-49         | 44.5     | 3               | 105        | 2                 | 70              | 0              | 5               | 175        |



| 50-59        | 54.5     | 7               | 175        | 0                 | 0               | 0              | 7               | 175         |
|--------------|----------|-----------------|------------|-------------------|-----------------|----------------|-----------------|-------------|
| 60-69        | 64.5     | 19              | 285        | 5                 | 75              | 0              | 24              | 360         |
| 70-79        | 74.5     | 39              | 195        | 22                | 110             | 0              | 61              | 305         |
| 80-89        | 84.5     | 47              | 0          | 45                | 0               | 0              | 92              | 0           |
| 90-99        | 94.5     | 24              | 0          | 48                | 0               | 0              | 72              | 0           |
| ≥100         |          | 0               | 0          | 2                 | 0               | 0              | 2               | 0           |
| <b>Total</b> |          | <b>140</b>      | <b>815</b> | <b>124</b>        | <b>255</b>      | <b>0</b>       | <b>264</b>      | <b>1070</b> |
| <b>Peru</b>  |          |                 |            |                   |                 |                |                 |             |
| Age group    | Midpoint | Deaths<br>Males | PYLL Males | Deaths<br>Females | PYLL<br>Females | Sex<br>unknown | Total<br>deaths | Total PYLL  |
| 0-4          | 2        | 23              | 1794       | 22                | 1716            | 0              | 45              | 3510        |
| 5-9          | 7        | 18              | 1314       | 12                | 876             | 0              | 30              | 2190        |
| 10.-14       | 12       | 13              | 884        | 12                | 816             | 0              | 25              | 1700        |
| 15-19        | 17       | 22              | 1386       | 14                | 882             | 0              | 36              | 2268        |
| 20-24        | 22       | 57              | 3306       | 38                | 2204            | 0              | 95              | 5510        |
| 25-29        | 27       | 92              | 4876       | 42                | 2226            | 0              | 134             | 7102        |
| 30-34        | 32       | 207             | 9936       | 113               | 5424            | 0              | 320             | 15360       |
| 35-39        | 37       | 364             | 15652      | 125               | 5375            | 0              | 489             | 21027       |
| 40-44        | 42       | 647             | 24586      | 226               | 8588            | 0              | 873             | 33174       |
| 45-49        | 47       | 1123            | 37059      | 366               | 12078           | 0              | 1489            | 49137       |
| 50-54        | 52       | 1674            | 46872      | 504               | 14112           | 0              | 2178            | 60984       |
| 55-59        | 57       | 2360            | 54280      | 796               | 18308           | 0              | 3156            | 72588       |
| 60-64        | 62       | 2805            | 50490      | 1121              | 20178           | 0              | 3926            | 70668       |
| 65-69        | 67       | 2931            | 38103      | 1299              | 16887           | 0              | 4230            | 54990       |
| 70-74        | 72       | 2708            | 21664      | 1211              | 9688            | 0              | 3919            | 31352       |
| 75-79        | 77       | 2181            | 6543       | 1018              | 3054            | 0              | 3199            | 9597        |
| 80-84        | -        | 1669            | -          | 845               | -               | 0              | 2514            | -           |
| 85-89        | -        | 1032            | -          | 551               | -               | 0              | 1583            | -           |
| 90-94        | -        | 408             | -          | 248               | -               | 0              | 656             | -           |
| 95-99        | -        | 83              | -          | 72                | -               | 0              | 155             | -           |

| 100-104         | -        | 10      | -          | 5       | -            | 0           | 15           | -          |
|-----------------|----------|---------|------------|---------|--------------|-------------|--------------|------------|
| 104-109         | -        | 1       | -          | 0       | -            | 0           | 1            | -          |
| Total           |          | 20428   | 318745     | 8640    | 122412       | 0           | 29068        | 441157     |
| <b>Scotland</b> |          |         |            |         |              |             |              |            |
| Age group       | Midpoint | Males   | PYLL Males | Females | PYLL Females | Sex unknown | Total deaths | Total PYLL |
| <1              | 0.5      | 0       | 0          | 0       | 0            | 0           | 0            | 0          |
| 1.-14           | 7.5      | 0       | 0          | 0       | 0            | 0           | 0            | 0          |
| 15-44           | 29.5     | 14      | 700        | 14      | 700          | 0           | 28           | 1400       |
| 45-64           | 54.5     | 230     | 5750       | 121     | 3025         | 0           | 351          | 8775       |
| 65-74           | 69.5     | 375     | 3750       | 229     | 2290         | 0           | 604          | 6040       |
| 75-79           | 77       | 363.78  | 1091.34    | 25.6    | 76.8         | 0           | 389.38       | 1168.14    |
| 80+             | -        | 1115.22 | 0          | 1741.4  | 0            | 0           | 2856.62      | 0          |
| Total           |          | 2098    | 11291.34   | 2131    | 6091.8       | 0           | 4229         | 17383.14   |
| <b>Slovenia</b> |          |         |            |         |              |             |              |            |
| Age group       | Midpoint | Males   | PYLL Males | Females | PYLL Females | Sex unknown | Total deaths | Total PYLL |
| 0-14            | 7        | 0       | 0          | 0       | 0            | 0           | 0            | 0          |
| 15-44           | 29.5     | 0       | 0          | 0       | 0            | 0           | 0            | 0          |
| 45-54           | 49.5     | 1       | 30         | 1       | 30           | 0           | 2            | 60         |
| 55-64           | 59.5     | 3       | 60         | 1       | 20           | 0           | 4            | 80         |
| 65-74           | 69.5     | 10      | 100        | 5       | 50           | 0           | 15           | 150        |
| 75-79           | 77       | 13.6    | 40.8       | 10.05   | 30.15        | 0           | 23.65        | 70.95      |
| 80+             | -        | 22.4    |            | 60.95   |              | 0           | 83.35        | 0          |
| Total           |          | 50      | 230.8      | 78      | 130.15       | 0           | 128          | 360.95     |
| <b>Sweden</b>   |          |         |            |         |              |             |              |            |

| Age group            | Midpoint | Deaths<br>Males | PYLL<br>Males  | Deaths<br>Females | PYLL<br>Females | Sex<br>unknown | Total<br>deaths | Total<br>PYLL   |
|----------------------|----------|-----------------|----------------|-------------------|-----------------|----------------|-----------------|-----------------|
| 0-9                  | 4.5      | 0               | 0              | 0                 | 0               | 0              | 0               | 0               |
| 10-19                | 14.5     | 0               | 0              | 1                 | 65              | 0              | 1               | 65              |
| 20-29                | 24.5     | 4               | 220            | 3                 | 165             | 0              | 7               | 385             |
| 30-39                | 34.5     | 8               | 360            | 5                 | 225             | 0              | 13              | 585             |
| 40-49                | 44.5     | 32              | 1120           | 14                | 490             | 0              | 46              | 1610            |
| 50-59                | 54.5     | 134             | 3350           | 34                | 850             | 0              | 168             | 4200            |
| 60-69                | 64.5     | 305             | 4575           | 112               | 1680            | 0              | 417             | 6255            |
| 70-79                | 74.5     | 806             | 4030           | 442               | 2210            | 0              | 1248            | 6240            |
| 80-89                | -        | 1319            | 0              | 1178              | 0               | 0              | 2497            | 0               |
| 90+                  | -        | 622             | 0              | 939               | 0               | 0              | 1561            | 0               |
| <b>Total</b>         |          | <b>3230</b>     | <b>13655</b>   | <b>2728</b>       | <b>5685</b>     | <b>0</b>       | <b>5958</b>     | <b>19340</b>    |
| <b>Ukraine</b>       |          |                 |                |                   |                 |                |                 |                 |
| Age group            | Midpoint | Deaths<br>Males | PYLL<br>Males  | Deaths<br>Females | PYLL<br>Females | Sex<br>unknown | Total<br>deaths | Total<br>PYLL   |
| 0-19                 | 9.5      | 39              | 2730           | 21                | 1470            | 0              | 60              | 4200            |
| 20-39                | 29.5     | 142             | 7100           | 118               | 5900            | 0              | 260             | 13000           |
| 40-54                | 47       | 249             | 8217           | 247               | 8151            | 0              | 496             | 16368           |
| 55-59                | 57       | 122.85          | 2825.55        | 102.98            | 2368.54         | 0              | 225.83          | 5194.09         |
| 60-69                | 64.5     | 228.15          | 3422.25        | 168.02            | 2520.3          | 1              | 397.17          | 5942.55         |
| 70-79                | 74.5     | 157.74          | 788.7          | 203.36            | 1016.8          | 0              | 361.1           | 1805.5          |
| 80+                  | -        | 320.26          |                | 292.64            |                 |                | 612.9           |                 |
| <b>Total</b>         |          | <b>1259</b>     | <b>25083.5</b> | <b>1153</b>       | <b>21426.64</b> | <b>1</b>       | <b>2413</b>     | <b>46510.14</b> |
| <b>United States</b> |          |                 |                |                   |                 |                |                 |                 |
| Age group            | Midpoint | Deaths<br>Males | PYLL<br>Males  | Deaths<br>Females | PYLL<br>Females | Sex<br>unknown | Total<br>deaths | Total<br>PYLL   |
| 0-4                  | 2        | 21              | 1638           | 15                | 1170            | 0              | 36              | 2808            |

|       |      |         |          |         |          |   |         |           |
|-------|------|---------|----------|---------|----------|---|---------|-----------|
| 5.-14 | 9.5  | 22      | 1540     | 10      | 700      | 0 | 32      | 2240      |
| 15-24 | 19.5 | 216     | 12960    | 130     | 7800     | 0 | 346     | 20760     |
| 25-34 | 29.5 | 963     | 48150    | 489     | 24450    | 0 | 1452    | 72600     |
| 35-44 | 39.5 | 2597    | 103880   | 1196    | 47840    | 0 | 3793    | 151720    |
| 45-54 | 49.5 | 6803    | 204090   | 3164    | 94920    | 0 | 9967    | 299010    |
| 55-64 | 59.5 | 15374   | 307480   | 8299    | 165980   | 0 | 23673   | 473460    |
| 65-74 | 69.5 | 24552   | 245520   | 15353   | 153530   | 0 | 39905   | 399050    |
| 75-79 | 77   | 12077.1 | 36231.3  | 8794.4  | 26383.2  | 0 | 20871.5 | 62614.5   |
| 80+   | -    | 37483.9 | 0        | 47523.6 | 0        | 0 | 85007.5 | 0         |
| Total |      | 100109  | 961489.3 | 84974   | 522773.2 | 0 | 185083  | 1484262.5 |

**Supplementary Table 3. Potential Years of Life Lost (PYLL) by type of COVID-19 death reported**

|                                                      | Country         | PYLL per 100.000 |                    |
|------------------------------------------------------|-----------------|------------------|--------------------|
| COVID-19 as Cause of death                           | Australia       | 8.9              |                    |
|                                                      | Cyprus          | 24.9             |                    |
|                                                      | Kazakhstan      | 83.4             |                    |
|                                                      | England & Wales | 413.9            |                    |
|                                                      | France          | 154.8            |                    |
|                                                      | Georgia         | 3.1              | Africa             |
|                                                      | Scotland        | 334.7            | Asia & Middle East |
|                                                      | Sweden          | 198.4            | Australia          |
|                                                      | Ukraine         | 109.4            | Europe             |
|                                                      | Mean            | 147.9            | North America      |
| COVID-19 as Cause of death or contributing condition | Brazil          | 750.6            | South America      |
|                                                      | Colombia        | 594.7            |                    |
|                                                      | Peru            | 1381.0           |                    |
|                                                      | United States   | 470.7            |                    |
|                                                      | Cape Verde      | 108.3            |                    |
|                                                      | Slovenia        | 17.3             |                    |
|                                                      | Norway          | 20.0             |                    |
|                                                      | Israel          | 600.7            |                    |
|                                                      | Mean            | 492.9            |                    |
